# Supplementary material for: Self-supported formation of hierarchical NiCo2O4tetragonal microtubes with enhanced electrochemical properties
Source: Royal Society of Chemistry journal article supplement (doi:10.1039/c5ee03772g), 2016-01-01
Supplement: c5ee03772g1.pdf [file c5ee03772g1.pdf]

## Electronic Supplementary Information

---

### **Self-supported formation of hierarchical NiCo<sub>2</sub>O<sub>4</sub> tetragonal microtubes with enhanced electrochemical properties**

*Fei-Xiang Ma,<sup>ab‡</sup> Le Yu,<sup>a‡</sup> Cheng-Yan Xu<sup>b</sup> and Xiong Wen (David) Lou<sup>\*a</sup>*

<sup>a</sup> *School of Chemical and Biomedical Engineering, Nanyang Technological University, 62 Nanyang Drive, Singapore, 637459, Singapore.*

E-mail: xwlou@ntu.edu.sg; davidlou88@gmail.com;

Webpage: <http://www.ntu.edu.sg/home/xwlou/>

<sup>b</sup> *School of Materials Science and Engineering, Harbin Institute of Technology, Harbin 150001, China.*

<sup>‡</sup> These authors contributed equally to this work.

### **Experimental Section:**

*Preparation of NiCo<sub>2</sub>O<sub>4</sub> Microtubes:* In a typical synthesis, 0.5 mmol of Ni(Ac)<sub>2</sub>·4H<sub>2</sub>O and 1 mmol of Co(Ac)<sub>2</sub>·4H<sub>2</sub>O were dissolved into 3 ml of 1,3-propanediol completely. Then, 47 ml of isopropanol (IPA; Merck, 99.8%) was added into the above solution to form a pink solution. Thereafter, the resulting mixture was transferred into a Teflon-lined stainless steel autoclave and kept at 160 °C for 12 h. After cooling to room temperature naturally, the precipitate was separated by centrifugation, washed with ethanol for several times and dried in an oven at 70 °C for 12 h. Finally, the as-prepared precursor was calcined at 300 °C in air for 2 h with a ramping rate of 2 °C min<sup>-1</sup> to obtain NiCo<sub>2</sub>O<sub>4</sub> microtubes. As a reference, the hierarchical nanoflowers were synthesized by increasing the amount of 1,3-propanediol to 10 ml (isopropanol: 40 ml) with other conditions unchanged.

*Materials Characterization:* The morphology and structure of the products were characterized using transmission electron microscopy (TEM; JEOL, JEM-2010), and field-emission scanning electron microscopy (FESEM; JEOL, JSM-6700F) equipped with an energy-dispersive X-ray spectroscopy (EDX). X-ray diffraction (XRD) patterns were collected on a Bruker D2 Phaser X-Ray Diffractometer with Ni filtered Cu  $K\alpha$  radiation ( $\lambda = 1.5406 \text{ \AA}$ ) at a voltage of 30 kV and a current of 10 mA. X-ray photoelectron spectroscopy (XPS) measurements were performed on a VG ESCALAB MKII X-ray photoelectron spectrometer. All of the binding energies (BEs) in this XPS analysis were corrected for specimen charging with reference to the C 1s peak (set at 284.6 eV). Thermogravimetric analysis (TGA) was performed on SDT Q600 (TA Instruments). The nitrogen sorption measurement was carried out on Autosorb 6B at liquid nitrogen temperature.

*Electrochemical Measurements:* The working electrode consists of active material, carbon black (Super-P-Li), and polymer binder (polyvinylidene fluoride; PVDF) in a weight ratio of 70:20:10. The slurry was pasted onto commercial nickel foam and then dried at 120 °C overnight under vacuum. The electrochemical tests were conducted with a CHI 660D electrochemical workstation in an aqueous 2.0 M KOH electrolyte with a three-electrode cell, where Pt foil serves as the counter electrode and a saturated calomel electrode (SCE) as the reference electrode. The loading mass of NiCo<sub>2</sub>O<sub>4</sub> microtubes on nickel foam was about 1.0 mg cm<sup>-2</sup>. It should be pointed out that the capacitance of the electrode was calculated by the formula,  $C = It/\Delta V$ , where  $C$ ,  $I$ ,  $\Delta t$  and  $\Delta V$  are the specific capacitance (F g<sup>-1</sup>) of the electroactive materials, the discharge current density (A g<sup>-1</sup>), the discharge time (s), and the discharging potential range (V), respectively. Electrochemical impedance spectroscopy (EIS) measurement was carried out by applying an AC voltage with 1 mV amplitude in a frequency range from 0.1 Hz to 100 kHz at open circuit potential.

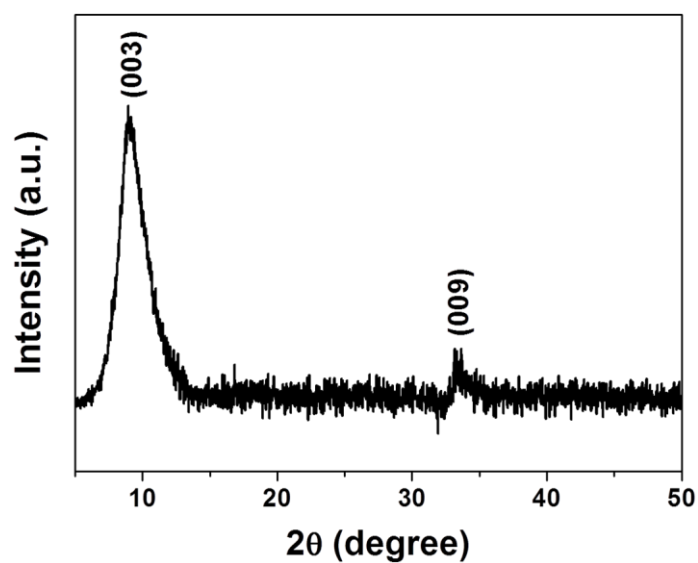

**Fig. S1** XRD pattern of the as-prepared hierarchical NiCo-LDH tetragonal microtubes.

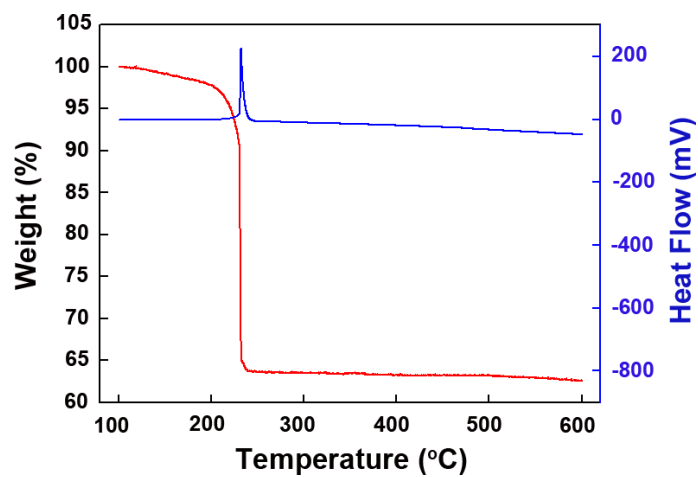

**Fig. S2** TGA-DSC curve of as-prepared hierarchical NiCo-LDH tetragonal microtubes with a heating rate of  $5\text{ }^{\circ}\text{C min}^{-1}$  from  $100\text{ }^{\circ}\text{C}$  to  $600\text{ }^{\circ}\text{C}$ .

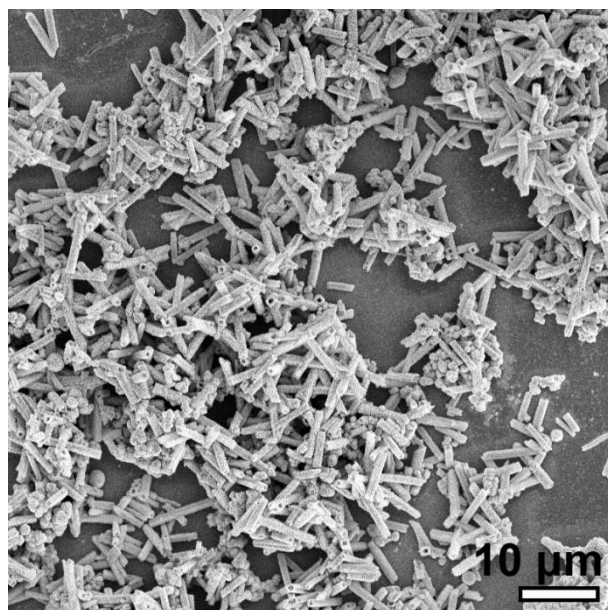

**Fig. S3** Low-magnification FESEM image of as-prepared hierarchical NiCo<sub>2</sub>O<sub>4</sub> tetragonal microtubes.

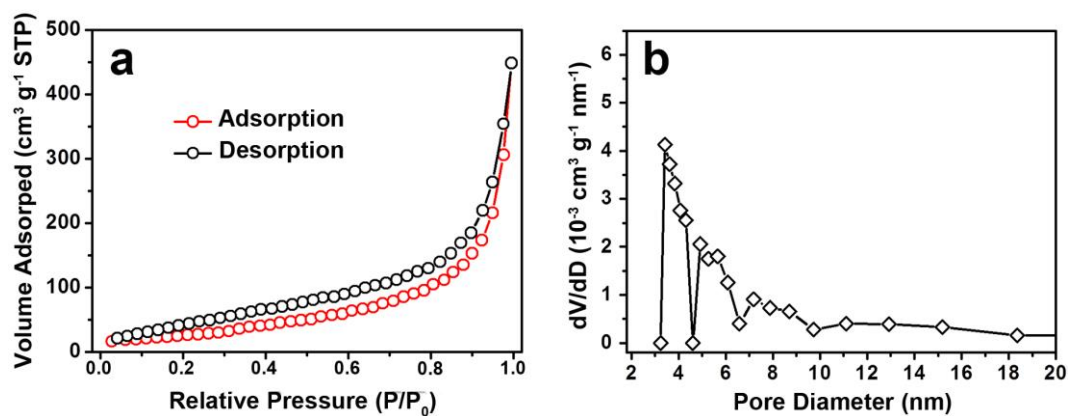

**Fig. S4** (a) N<sub>2</sub> adsorption-desorption isotherms and (b) the corresponding pore size distribution of as-prepared hierarchical NiCo<sub>2</sub>O<sub>4</sub> tetragonal microtubes.

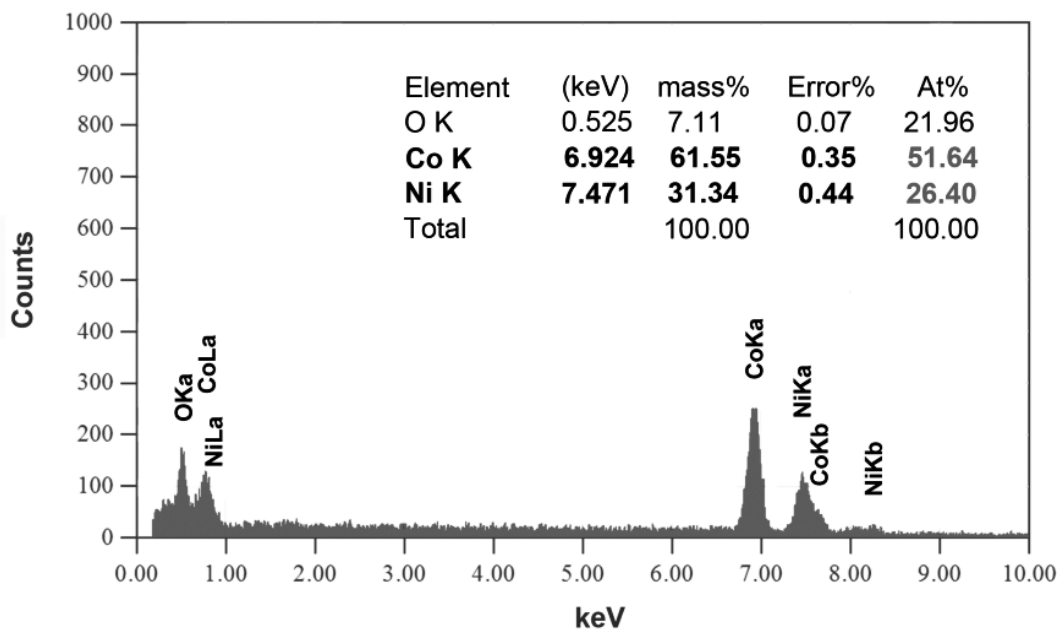

**Fig. S5** EDX result of the as-prepared hierarchical NiCo<sub>2</sub>O<sub>4</sub> tetragonal microtubes.

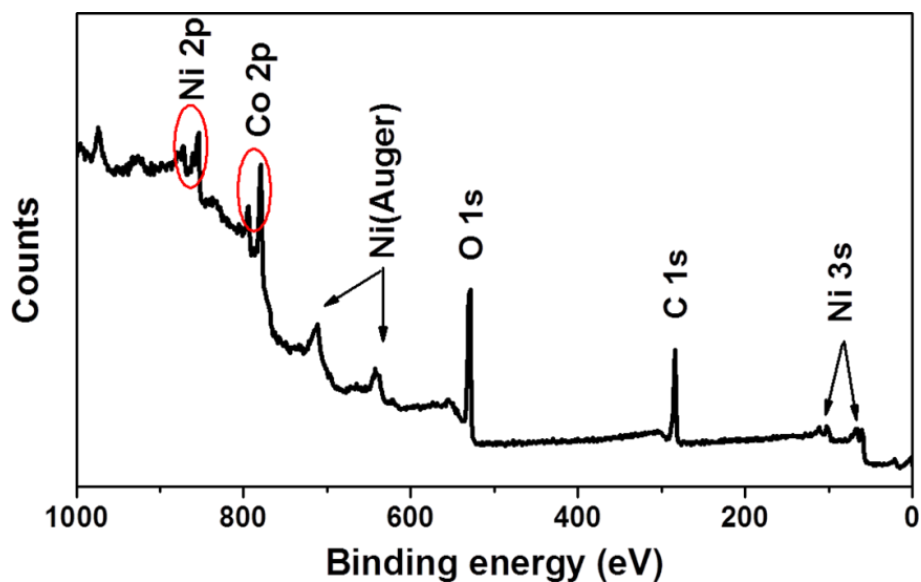

**Fig. S6** XPS spectrum of the as-prepared hierarchical NiCo<sub>2</sub>O<sub>4</sub> microtubes.

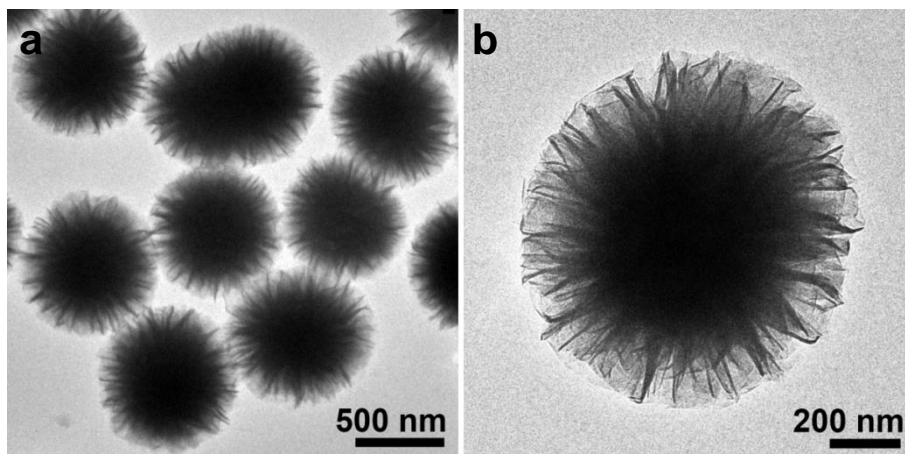

**Fig. S7** TEM images of as-prepared hierarchical Ni-Co precursor nanoflowers with 10 ml of 1,3-propanediol added.

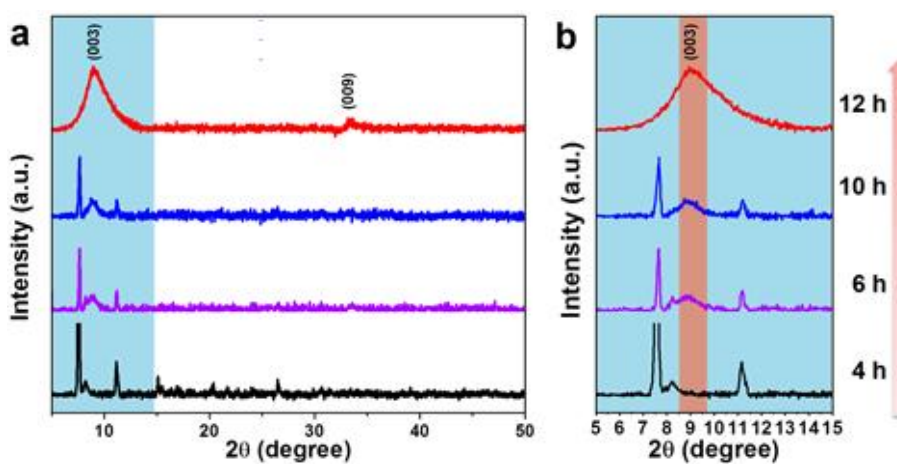

**Fig. S8** (a) XRD patterns and (b) the magnified peaks of the as-obtained products with different reaction times.

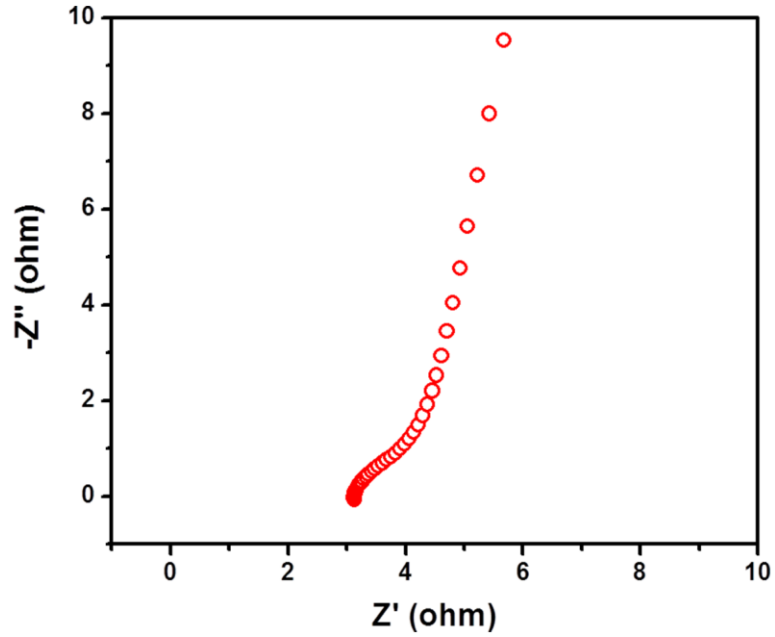

**Fig. S9** EIS spectrum of the as-prepared hierarchical NiCo<sub>2</sub>O<sub>4</sub> microtubes. In the high frequency region, the intersection of the curve at the real part indicates the resistance of the electrochemical system ( $R_s$ ). The small value confirms the good bulk conductivity of the NiCo<sub>2</sub>O<sub>4</sub> sample. Meanwhile, the small semicircle and ideal straight line along the imaginary axis in the low frequency regime correspond to the much low charge-transfer resistance at the electrode/electrolyte interface and the low diffusion resistance.

**Table S1.** Comparison of electrochemical performance of hierarchical NiCo<sub>2</sub>O<sub>4</sub> tetragonal microtubes with some representative NiCo<sub>2</sub>O<sub>4</sub> nanostructures

| NiCo <sub>2</sub> O <sub>4</sub> based nanostructures                                     | Loading mass (mg/cm <sup>-2</sup> ) | Specific capacitance (F g <sup>-1</sup> ) | Stability               | Ref.      |
|-------------------------------------------------------------------------------------------|-------------------------------------|-------------------------------------------|-------------------------|-----------|
| Hierarchical NiCo <sub>2</sub> O <sub>4</sub> microtubes                                  | ~1.0                                | 1180.1 (10 A g <sup>-1</sup> )            | 89.4 %<br>12000 cycles  | This work |
| NiCo <sub>2</sub> -DH/NiCo <sub>2</sub> O <sub>4</sub> nanoarrays                         | ~1.0                                | ~1640 (2 mA cm <sup>-2</sup> )            | 82.3%<br>2000 cycles    | 10        |
| NiCo <sub>2</sub> O <sub>4</sub> double-shell hollow spheres                              | 4                                   | 568 (1 A g <sup>-1</sup> )                | 85.8%<br>2000 cycles    | 34        |
| Mesoporous NiCo <sub>2</sub> O <sub>4</sub> nanowire arrays                               | ~1.2                                | 1102 (8 A g <sup>-1</sup> )               | ~100%<br>5000 cycles    | 35        |
| NiCo <sub>2</sub> O <sub>4</sub> nanosheets on Ni wires                                   | Not reported                        | 10.3F cm <sup>-3</sup> (0.08 mA)          | 78%<br>5000 cycles      | 36        |
| Co <sub>3</sub> O <sub>4</sub> /NiCo <sub>2</sub> O <sub>4</sub> double-shelled nanocages | ~1.0                                | 972 (10 A g <sup>-1</sup> )               | 92.5 %<br>12000 cycles  | 37        |
| NiCo <sub>2</sub> O <sub>4</sub> nanowires                                                | ~1.0                                | 760 (1 A g <sup>-1</sup> )                | 81%<br>3000 cycles      | 38        |
| NiCo <sub>2</sub> O <sub>4</sub> nanowires-rGO                                            | ~10.0                               | 618 (5 mV s <sup>-1</sup> )               | Not reported            | 39        |
| NiCo <sub>2</sub> O <sub>4</sub> nanoparticles-rGO                                        | ~2.5                                | 1222 (0.5 A g <sup>-1</sup> )             | 91.6%<br>3000 cycles    | 40        |
| NiCo <sub>2</sub> O <sub>4</sub> nanosheets-rGO                                           | ~2                                  | 835 (1 A g <sup>-1</sup> )                | No decay<br>4000 cycles | 41        |
| NiCo <sub>2</sub> O <sub>4</sub> nanoneedles/graphene                                     | ~5                                  | 650-400                                   | Not reported            | 42        |
| NiCo <sub>2</sub> O <sub>4</sub> nanotubes                                                | Not reported                        | 1647.6 (1 A g <sup>-1</sup> )             | 93.6%<br>3000 cycles    | 43        |
